# Supplementary material for: A novel spontaneous model of epithelial-mesenchymal transition (EMT) using a primary prostate cancer derived cell line demonstrating distinct stem-like characteristics
Source: PubMed Central journal article supplement (PMC5240554; doi:10.1038/srep40633), 2017-01-17
Supplement: srep40633-s1.pdf [file srep40633-s1.pdf]

**Supplementary Information:**

**A novel spontaneous model of epithelial-mesenchymal transition (EMT) using a primary prostate cancer derived cell line demonstrating distinct stem-like characteristics**

Naomi Dunning-Foreman, Jayakumar Vadakekolathu, Stéphanie A. Laversin, Morgan G. Mathieu, Stephen Reeder, A. Graham Pockley, Robert C. Rees, David J. Boock

## Supplementary Figure 1

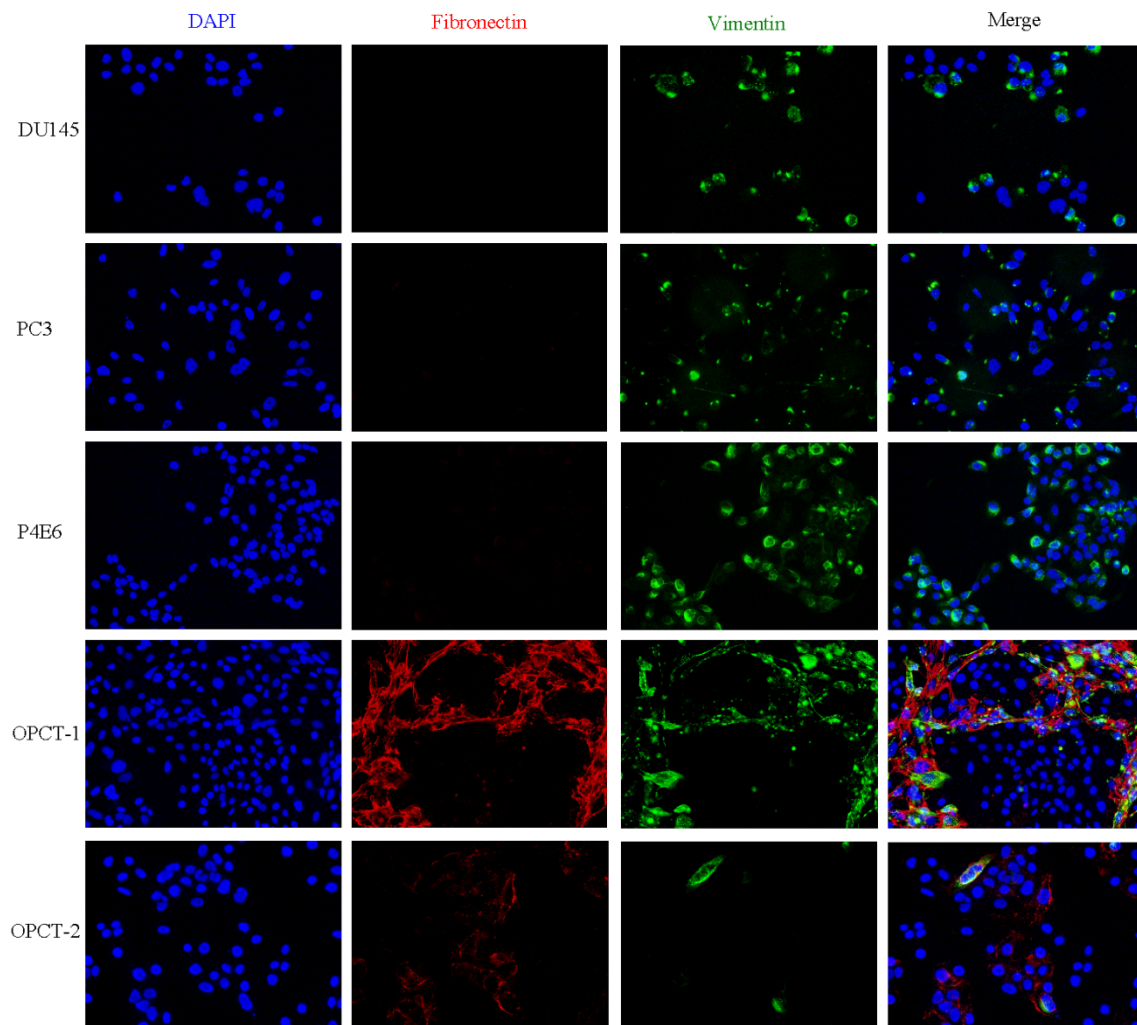

*Dual immunofluorescent staining of DUI145, PC3, P4E6, OPCT-1 and OPCT- 2 using a murine monoclonal antibody against cellular fibronectin and a rabbit polyclonal antibody against the mesenchymal marker, vimentin. E-cadherin was labelled with an anti-mouse Alexa Fluor®568-conjugated secondary antibody and vimentin was labelled with an anti-rabbit Alexa Fluor®488-conjugated secondary antibody. Nuclear staining was achieved using mounting media with DAPI. Representative images. Image magnification at x20.*

Supplementary Figure 2:

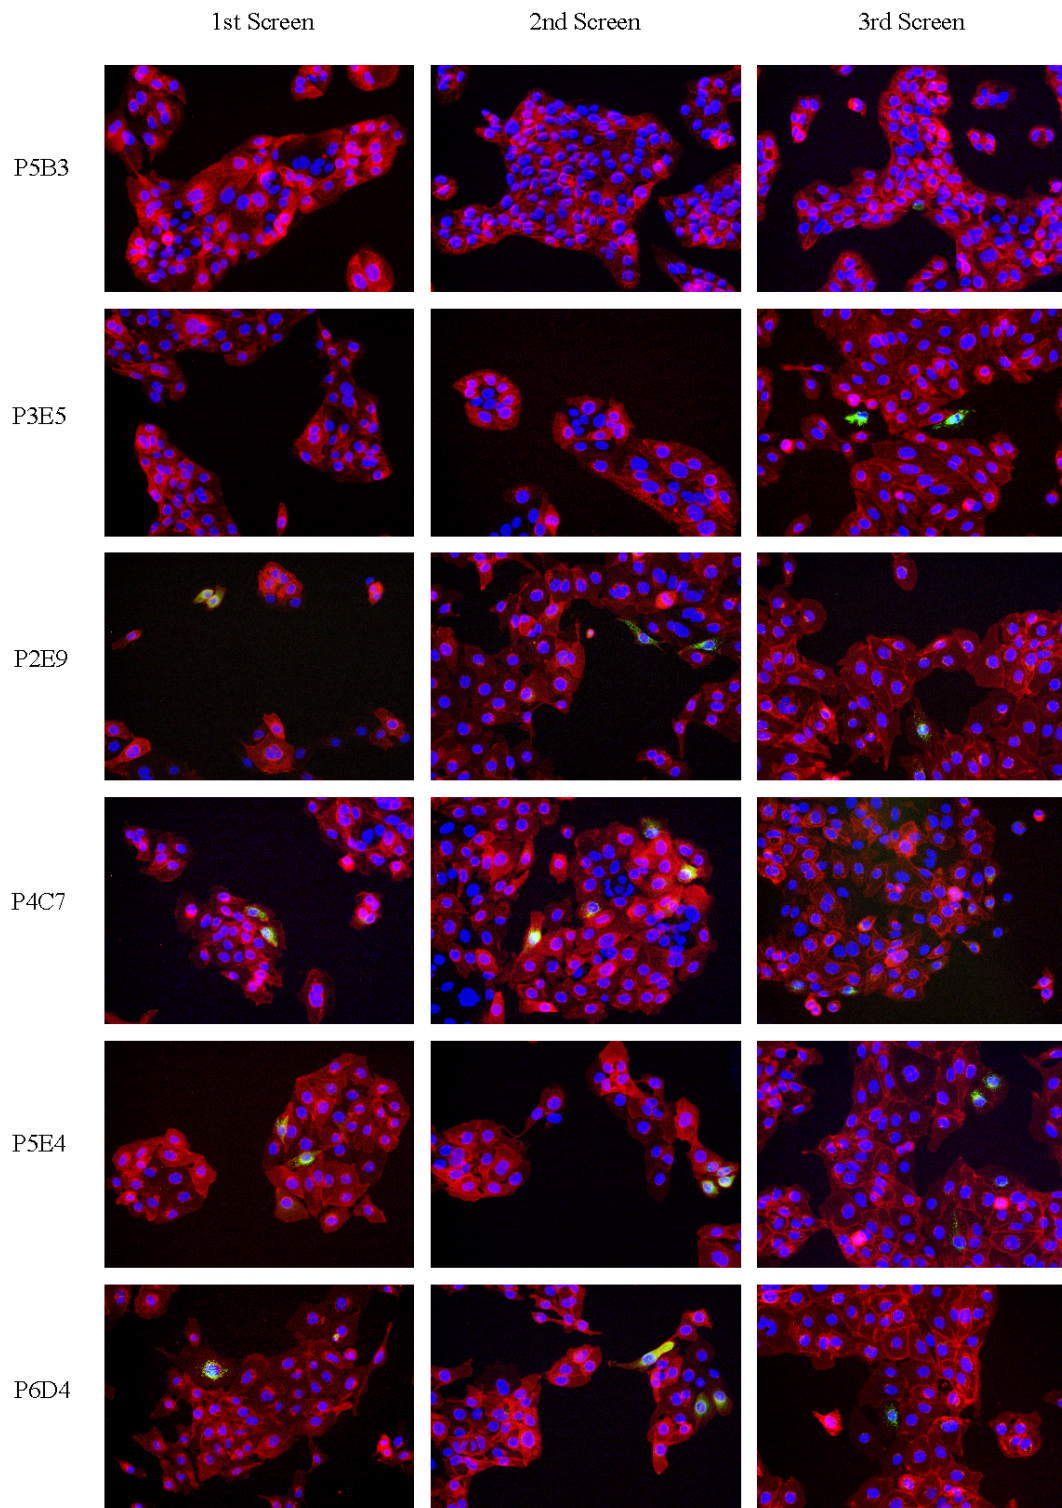



## Supplementary Figure 2 (Continued)

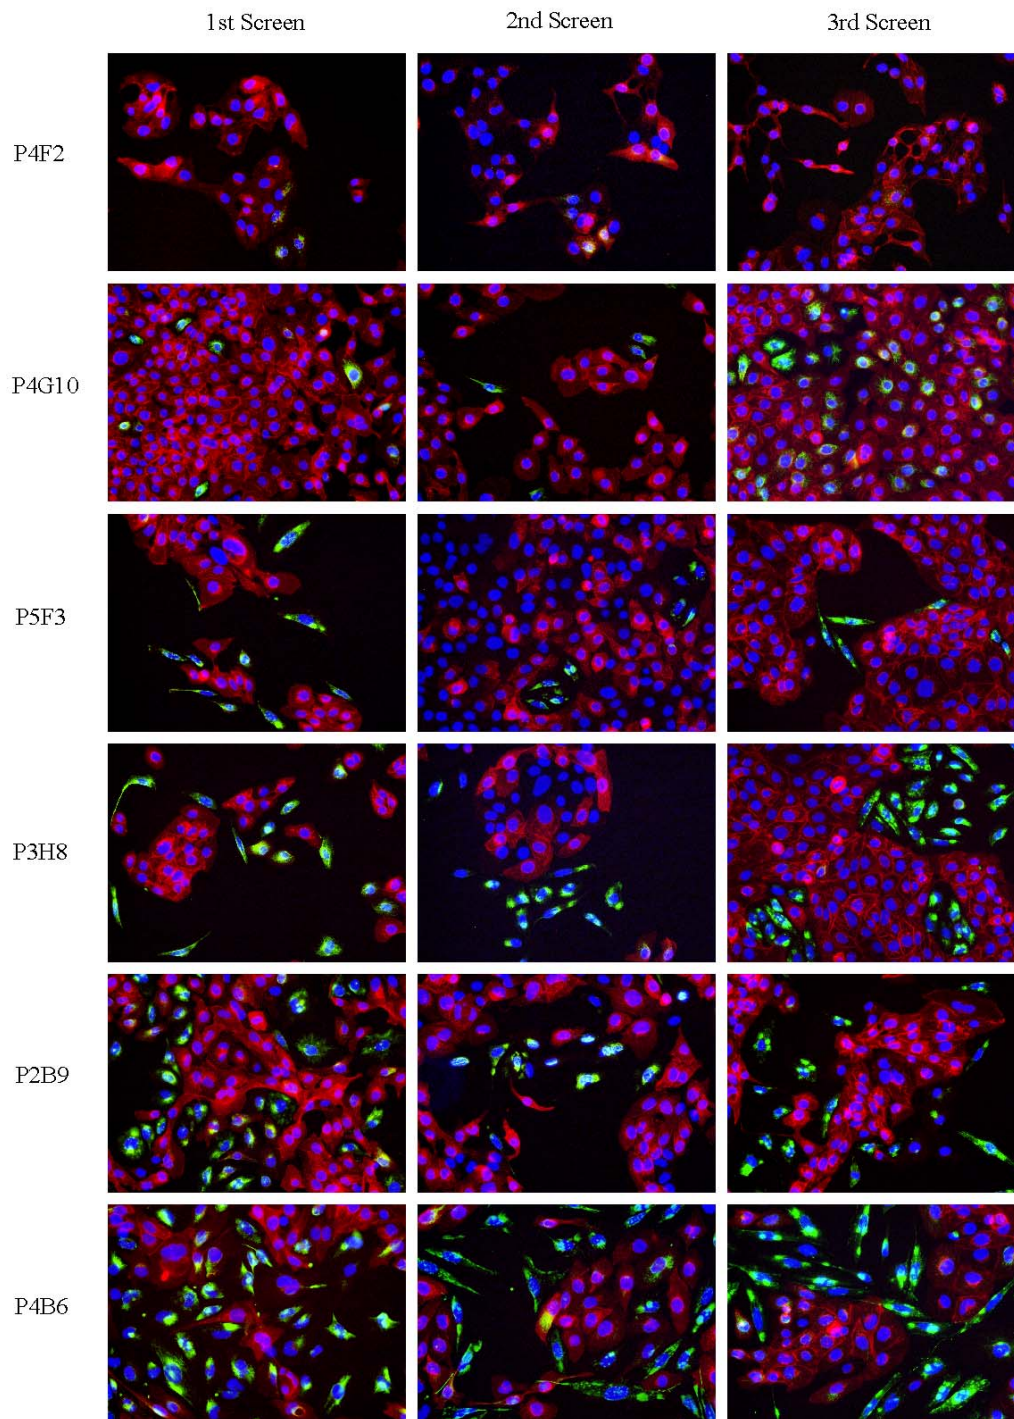

**Supplementary Figure 2:** Dual immunofluorescent staining of 1-12 OPCT-1 clones of interest; P5B3, P3E5, P2E9, P4C7, P5E4, P6D4, P4F2, P4G10, P5F3, P3H8, P2B9 and P4B6, using a murine monoclonal antibody against the epithelial marker, E-cadherin and a rabbit polyclonal antibody against the mesenchymal marker, vimentin. E-cadherin was labelled with an anti-mouse Alexa Fluor®568-conjugated secondary antibody and vimentin was labelled with an anti-rabbit Alexa Fluor®488-conjugated secondary antibody. Nuclear staining was achieved using mounting media with DAPI. 1<sup>st</sup> screen represents the initial screening of the 51 clones, from which these clones were selected (P2), 2<sup>nd</sup> screen represents the second screening conducted after defrosting and passaging the cells (P3) and 3<sup>rd</sup> screen represents the third screening conducted after defrosting and passaging the clones for a second time (P4). (n=3). Representative images. Image magnification at x20.

Supplementary Figure 3

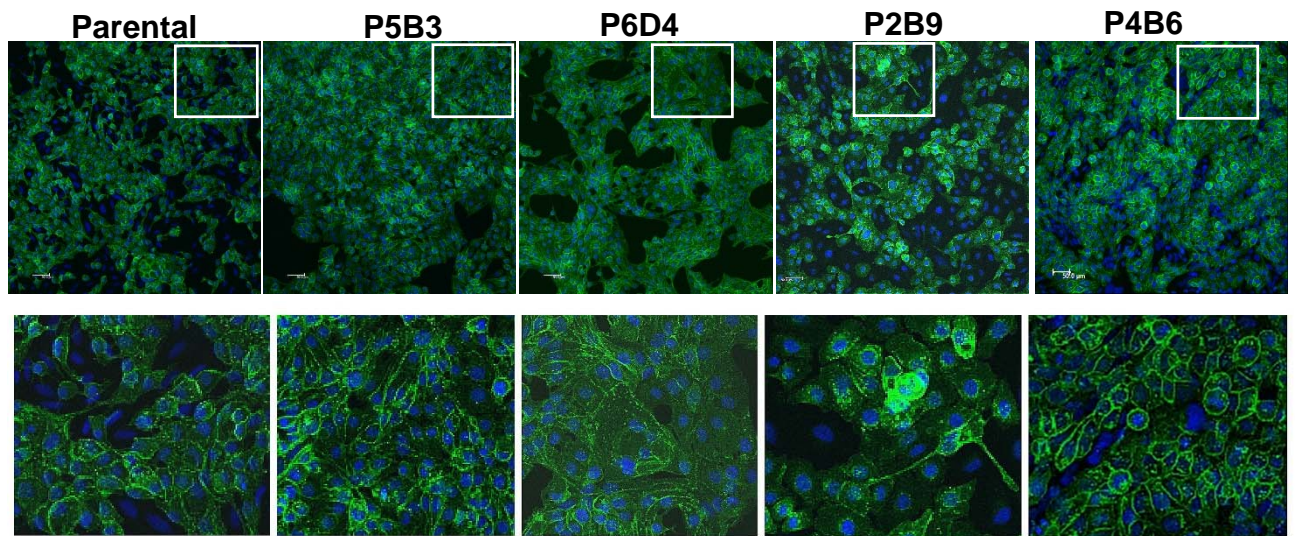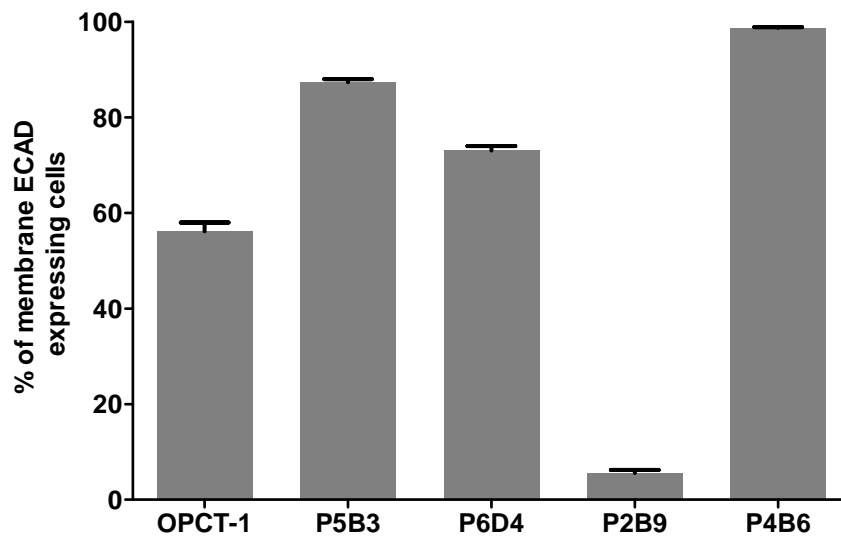

Supplementary Figure 3: Confocal images showing the localisation of E-cadherin in parental and clonal progenies of OPCT-1 and bar graph showing percentage of membrane localised E-cadherin for each clone and the parental line.(magnified images of selected regions also provided for better visualisation of E-cadherin localisation. Scale bar=50μM.

**Supplementary Figure 4**

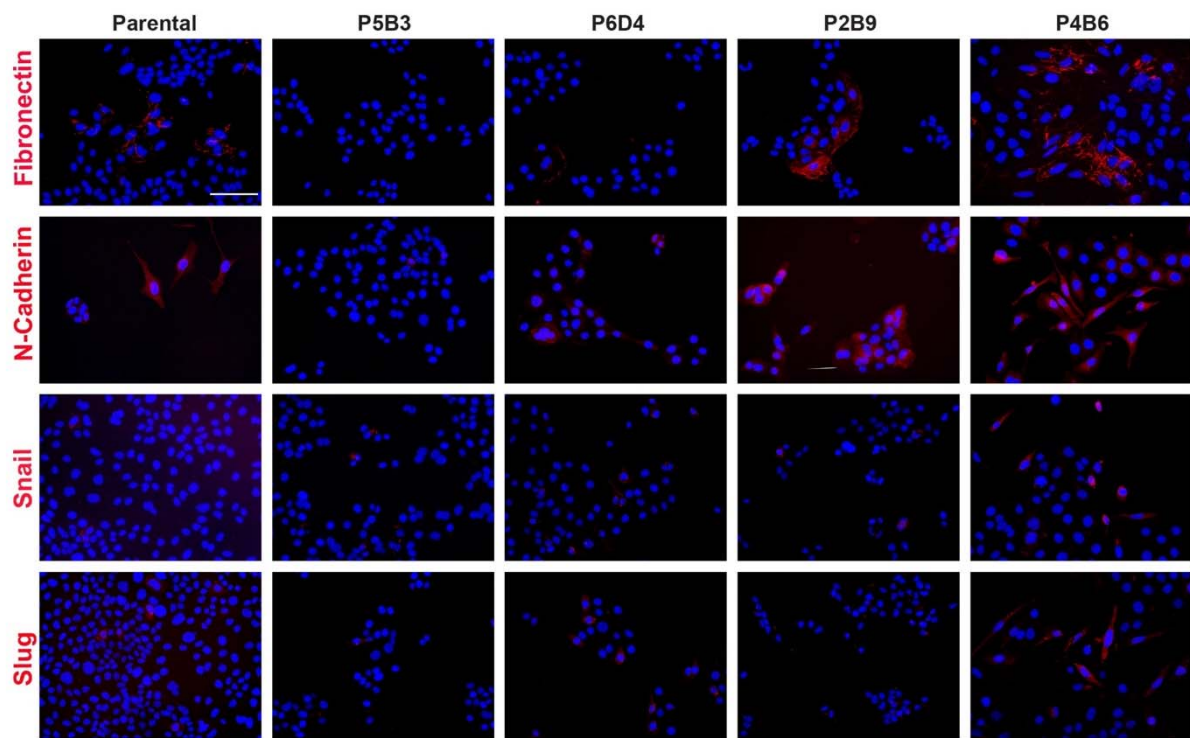

*Supplementary Figure 4: Immunofluorescence of fibronectin, N-Cadherin, Slug and Snail in the parental OPCT-1 and the four clones. Magnification 20x; scale bar 50  $\mu$ m.*



**Supplementary Figure 5**

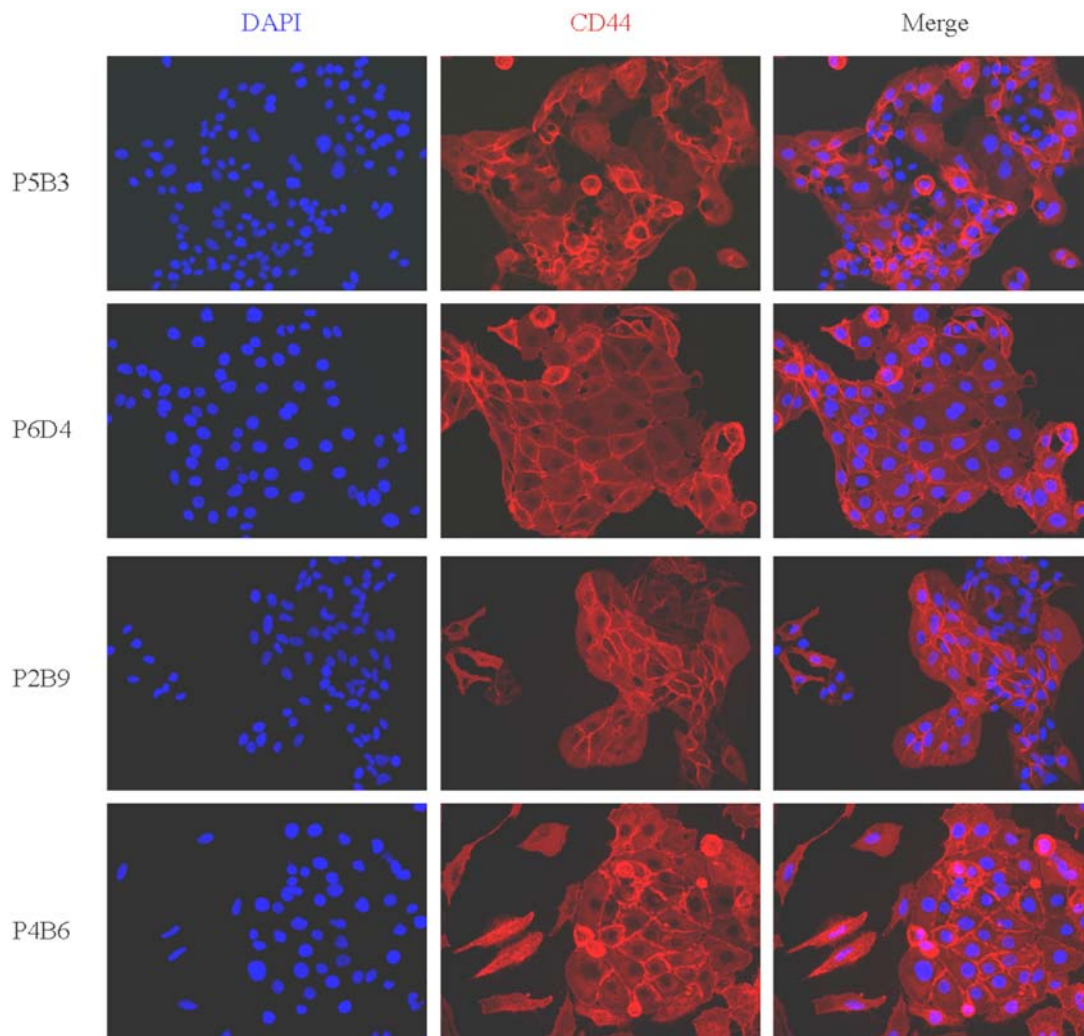

**Supplementary Figure 5:** Immunofluorescent staining of clones P5B3, P6D4, P5F3, P2B9, and P4B6 using a mouse monoclonal antibody against CD44. Secondary antibody labelling was achieved using an anti-mouse AlexaFluor®568-conjugated secondary antibody and nuclear staining was performed using mounting media with DAPI (n=3). Representative images. Image magnification at x20.

## Supplementary Figure 6

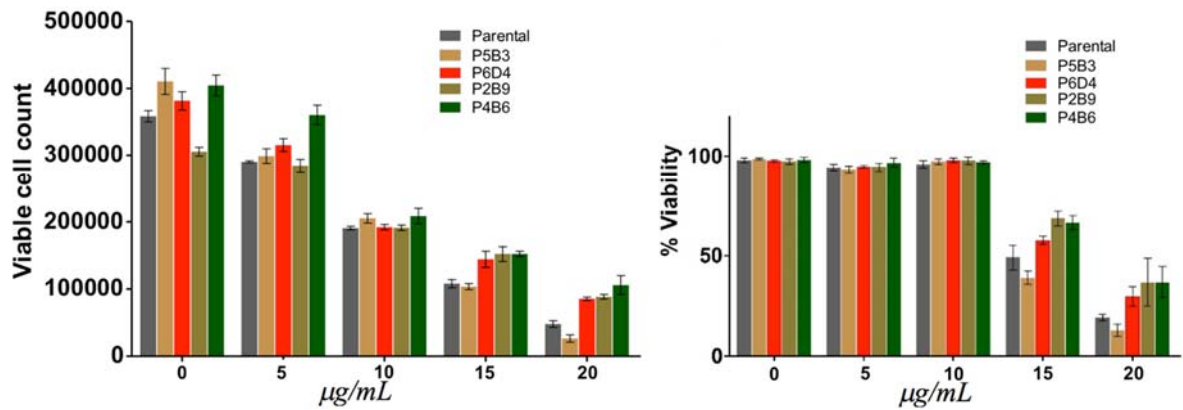

**Supplementary Figure 6:** Optimal concentration of mitomycin for wound healing assay was determined using cultured cells ( $1.5 \times 10^5$  cells/well seeded overnight in a 24 well plate). the cells were treated with different concentrations of mitomycin for 2 h. after two hours the cells were washed three times with sterile PBS and the wells were replenished with normal tissue culture media. after 24 h in normal growth conditions the cells viability and number had been determined using an automated cell counter (NucleoCounter® NC-250™). 10 µg/mL of mitomycin for 2 h was found to be optimal for arresting cell proliferation without compromising viability.



Supplementary Figure 7

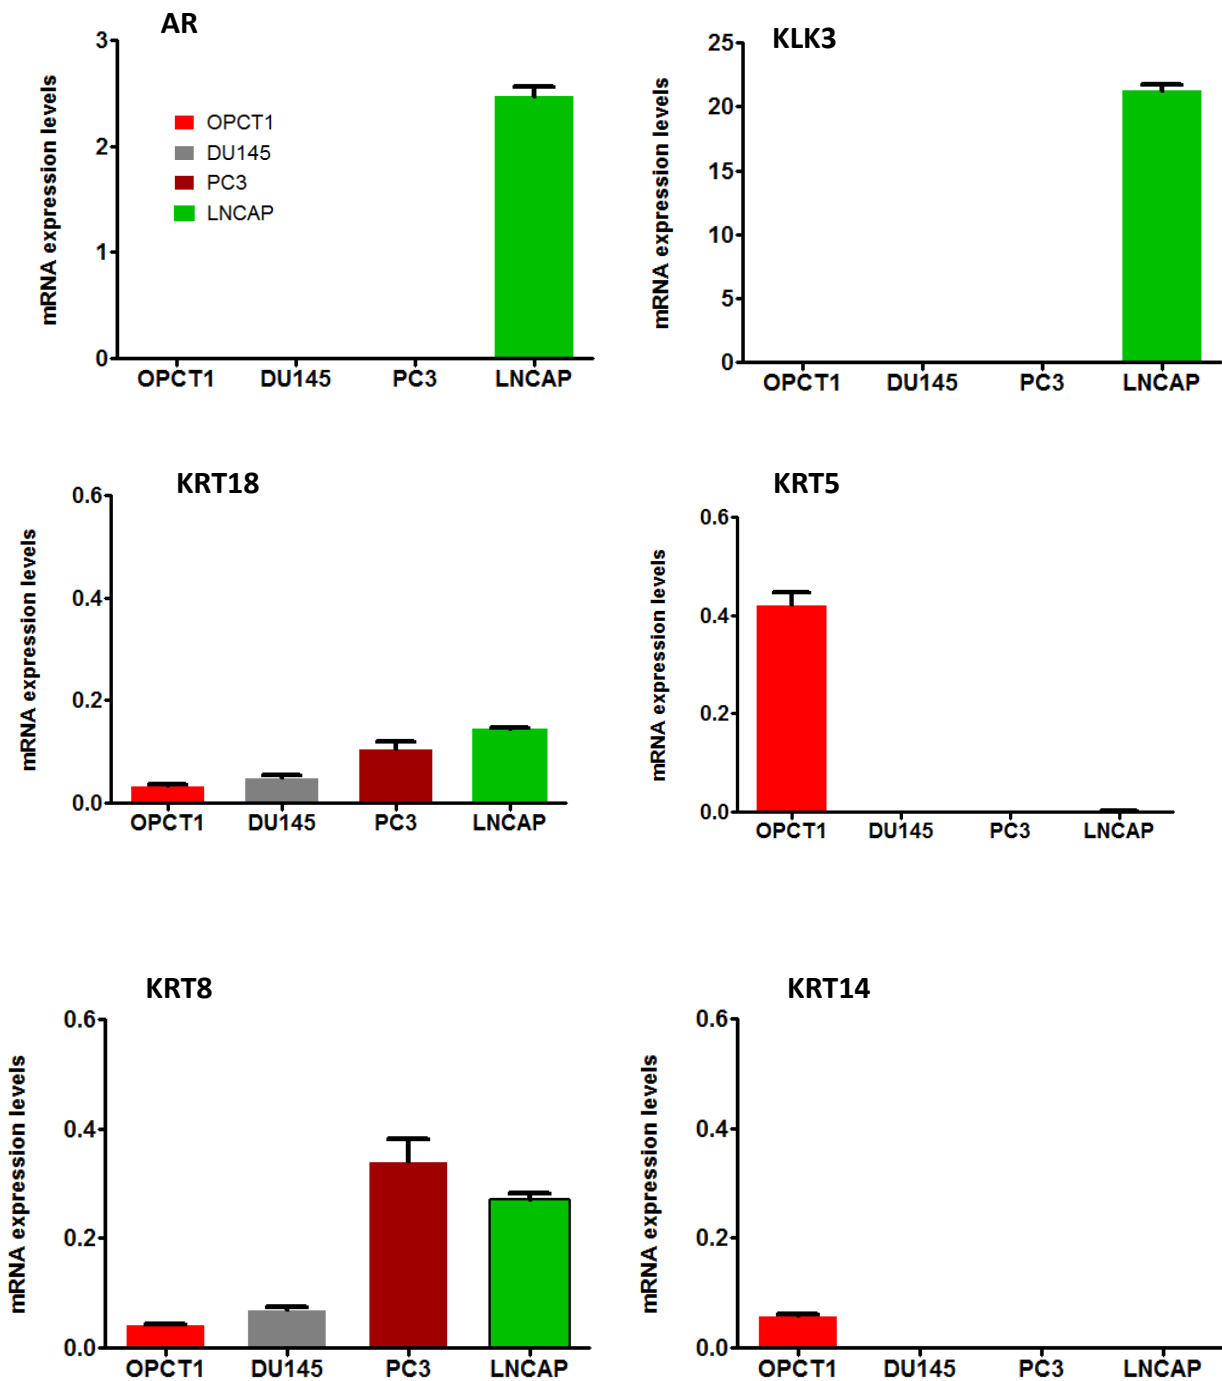

**Supplementary Figure 7:** Expression of different markers used to differentiate basal, intermediate and luminal characteristics of prostate cancer cells using qRT PCR. Along with OPCT-1, other classical cell lines (LNCAP, DU145 and PC3) were also profiled. As is known from the literature, LNCAP showed a prominent luminal phenotype with the expression of androgen receptor (AR), PSA (KLK3) and cytokeratin (CK)-18 and 8, with CK-5 and CK14 being completely absent. Similar to DU145 and PC3, OPCT-1 lack the expression of AR and PSA, thereby indicating their non-luminal characteristics. Although high expression of CK-5 and low expression of CK14 was uniquely detected in OPCT-1, expression of a key the basal phenotype marker, p63, was not detected, thereby indicating a transit amplifying genotype in OPCT1.

## Supplementary Figure 8

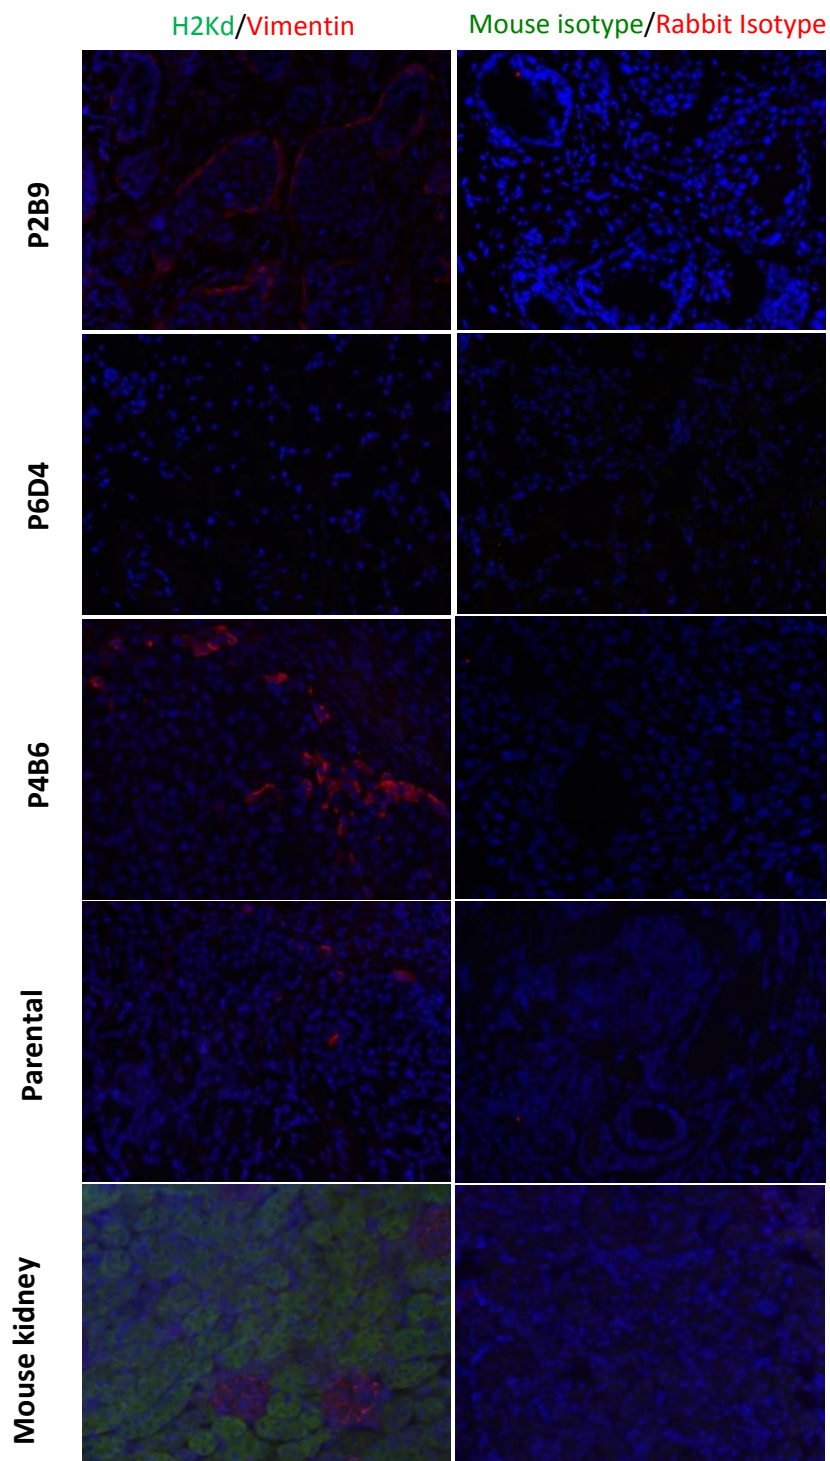

**Supplementary Figure 8:** Representative immunofluorescent staining of tumour sections derived from clones P5B3, P6D4, P2B9, P4B6 and parental OPCT-1 and murine kidney using a monoclonal antibody specific for murine MHC class I H-2<sup>Kd</sup>. Sections were labelled with a murine monoclonal antibody against MHC class I H-2<sup>Kd</sup> and a rabbit polyclonal antibody against murine vimentin. Primary antibody staining was detected using anti-mouse Alexa Fluor® 488 and anti-rabbit Alexa Fluor® 568 antibodies (x20 magnification). The absence of H-2<sup>Kd</sup> staining in vimentin positive cells indicates that these cells are of human origin.

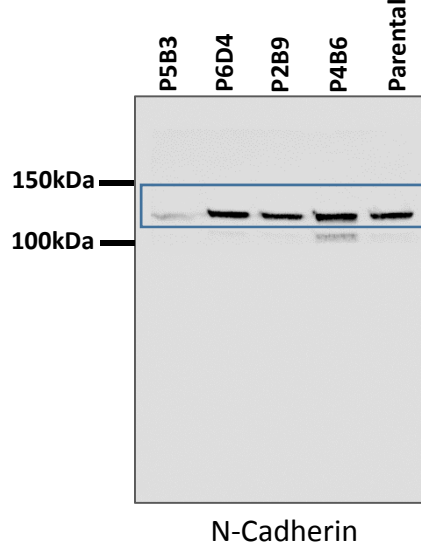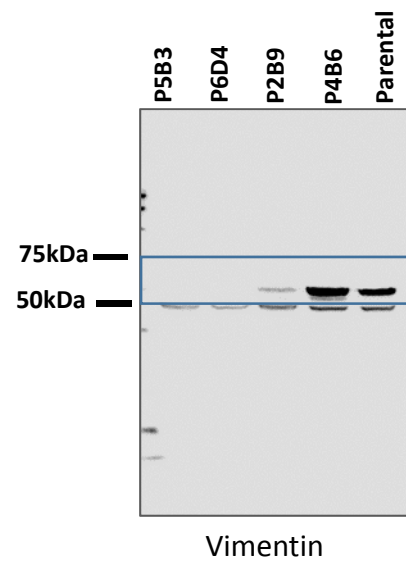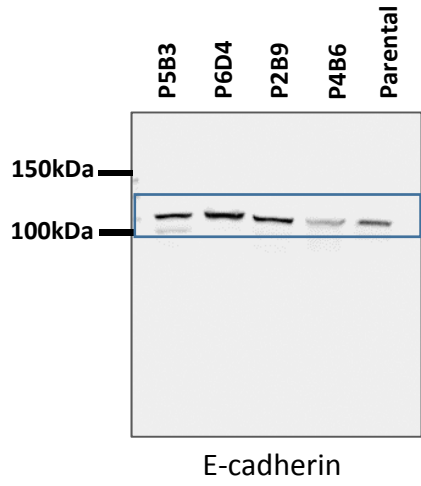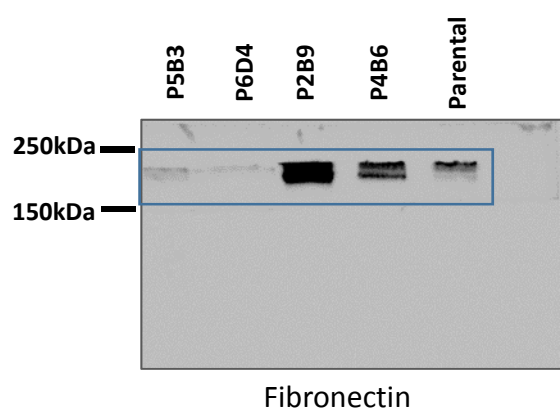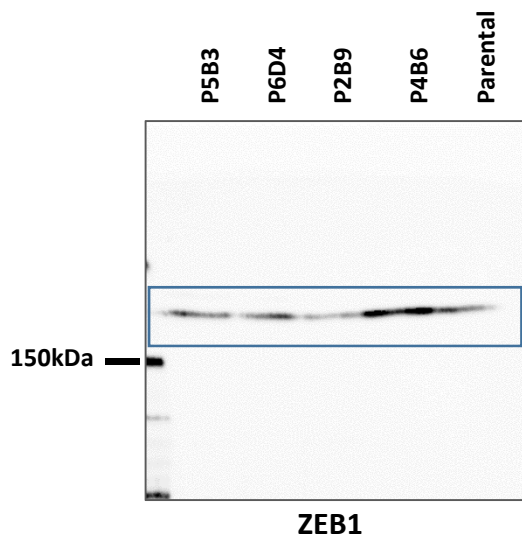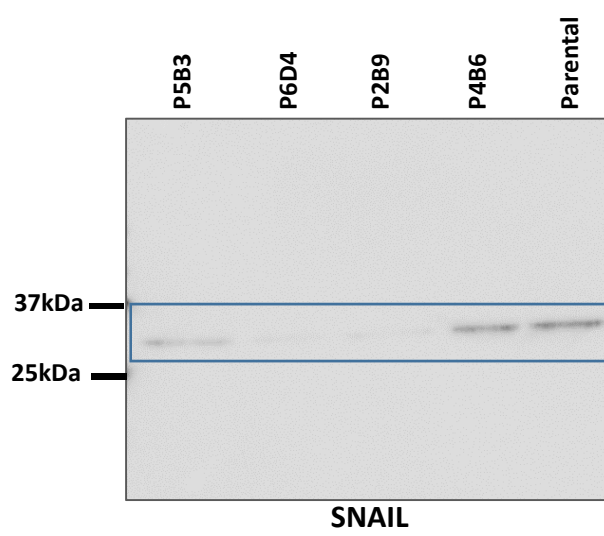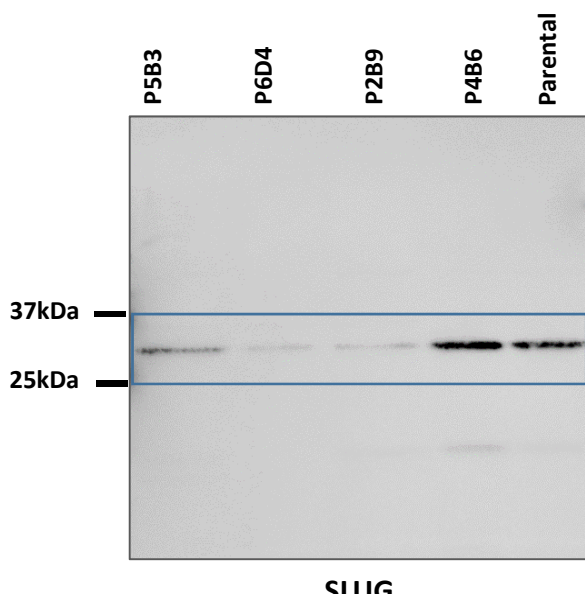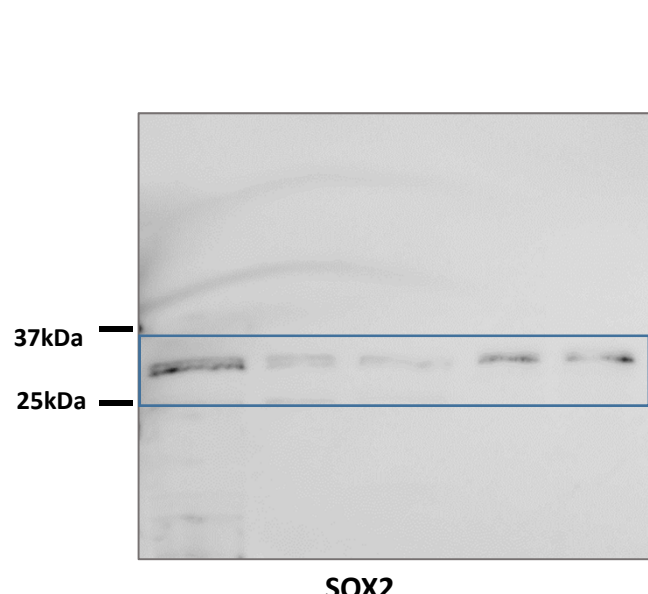



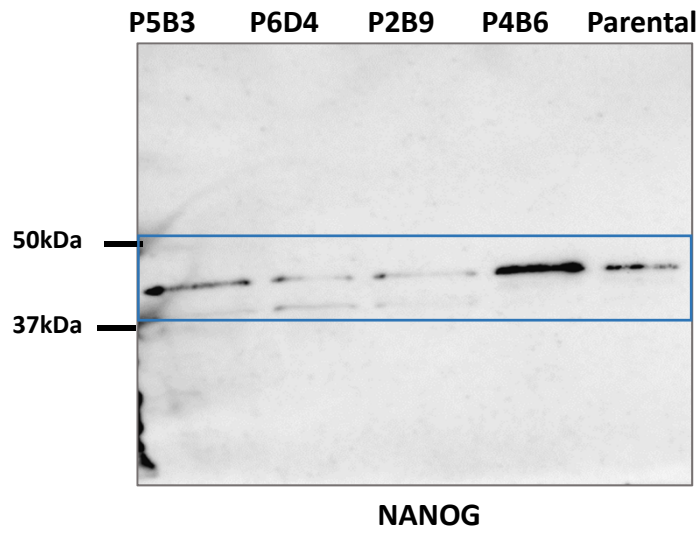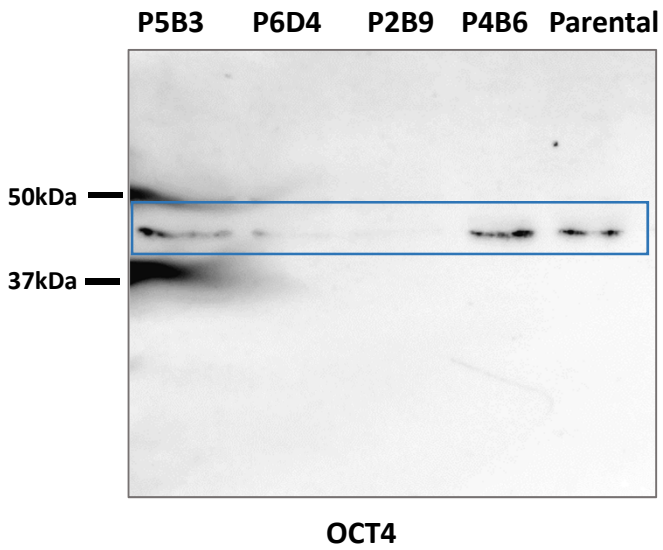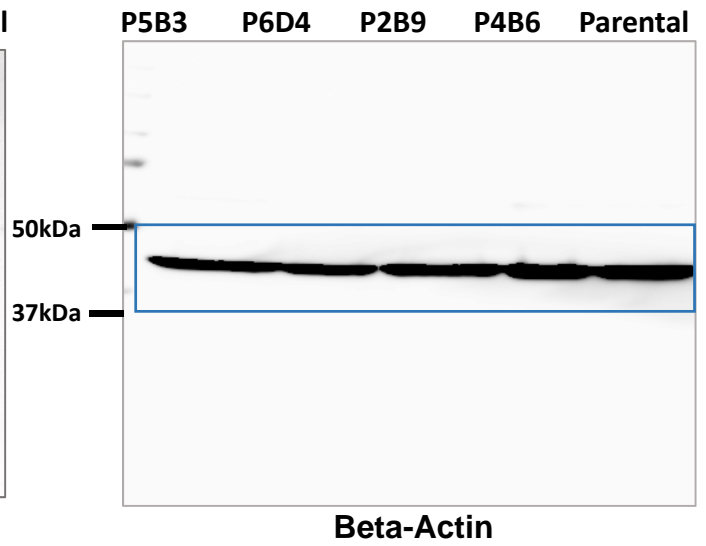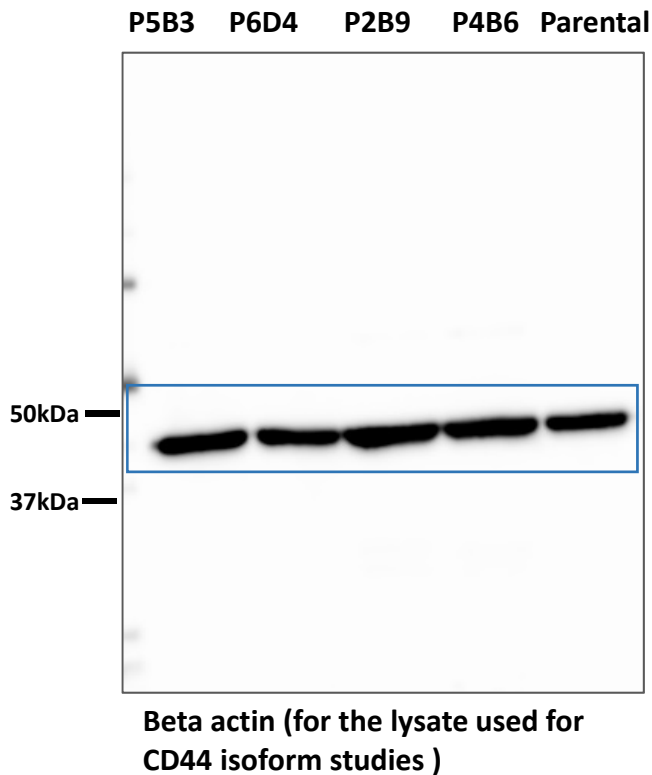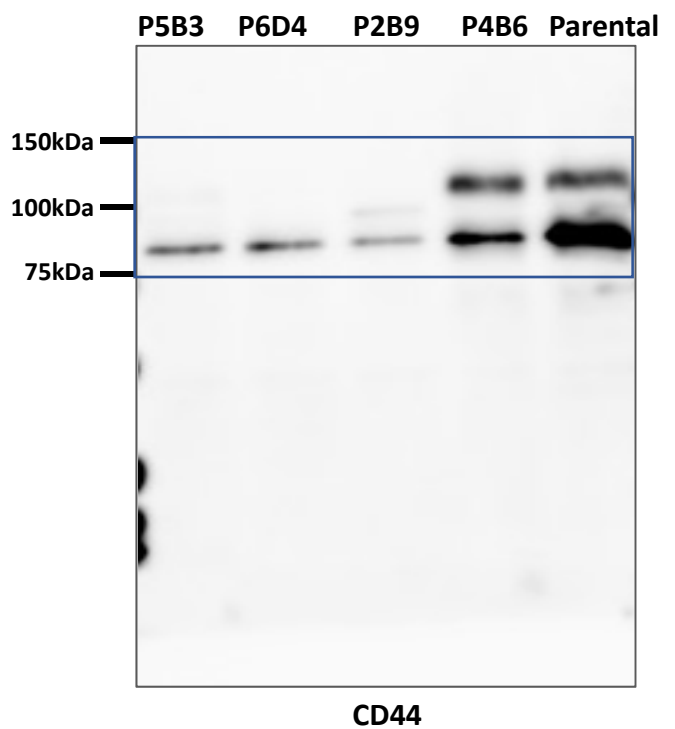

Supplementary Figure 9: Unprocessed original scans of Western blots

**Supplementary Table 1: Demonstrating the results reporting the expression of E-Cadherin, Vimentin and CD44 by 51 OPCT-1 clones screened by immunofluorescence**

| <i>Clone</i> | <i>E-Cadherin</i> | <i>Vimentin</i> | <i>Cellular co-expression</i> | <i>CD44</i> |
|--------------|-------------------|-----------------|-------------------------------|-------------|
| <i>P1C7</i>  | +++               | +++             | Yes                           | +++         |
| <i>P1D2</i>  | +++               | ++              | Yes                           | +++         |
| <i>P1D4</i>  | +++               | ++              | Yes                           | +++         |
| <i>P1E6</i>  | +++               | +++             | Yes                           | +++         |
| <i>P1G3</i>  | +++               | ++              | Yes                           | +++         |
| <i>P2B9</i>  | +++               | +++             | Yes                           | +++         |
| <i>P2D8</i>  | +++               | ++              | Yes                           | +++         |
| <i>P2E7</i>  | +++               | +               | Yes                           | +++         |
| <i>P2E9</i>  | +++               | +               | Yes                           | +++         |
| <i>P2F3</i>  | +++               | +               | Yes                           | +++         |
| <i>P2G3</i>  | +++               | +               | Yes                           | +++         |
| <i>P3B11</i> | +++               | +               | Yes                           | +++         |
| <i>P3D3</i>  | +++               | +               | Yes                           | +++         |
| <i>P3D10</i> | +++               | +               | No                            | +++         |
| <i>P3D11</i> | +++               | ++              | Yes                           | +++         |
| <i>P3E5</i>  | +++               | -               | n/a                           | +++         |
| <i>P3G3</i>  | +++               | ++              | Yes                           | +++         |
| <i>P3G10</i> | +++               | ++              | Yes                           | +++         |
| <i>P3H8</i>  | +++               | +++             | Yes                           | +++         |
| <i>P4B6</i>  | +++               | +++             | Yes                           | +++         |
| <i>P4C3</i>  | +++               | +               | Yes                           | +++         |
| <i>P4C7</i>  | +++               | +               | Yes                           | +++         |
| <i>P4E10</i> | +++               | +               | Yes                           | +++         |
| <i>P4F2</i>  | +++               | +               | Yes                           | +++         |
| <i>P4F4</i>  | +++               | +++             | Yes                           | +++         |
| <i>P4G6</i>  | +++               | +++             | Yes                           | +++         |
| <i>P4G10</i> | +++               | ++              | Yes                           | +++         |
| <i>P5A5</i>  | +++               | +               | Yes                           | +++         |
| <i>P5A6</i>  | +++               | +               | Yes                           | +++         |
| <i>P5B3</i>  | +++               | -               | n/a                           | ++          |
| <i>P5B7</i>  | +++               | +++             | Yes                           | +++         |
| <i>P5C3</i>  | +++               | +               | Yes                           | +++         |
| <i>P5D4</i>  | +++               | +++             | Yes                           | +++         |
| <i>P5D6</i>  | +++               | +               | No                            | +++         |
| <i>P5E4</i>  | +++               | +               | Yes                           | +++         |
| <i>P5E8</i>  | +++               | +               | Yes                           | +++         |
| <i>P5F8</i>  | +++               | +++             | Yes                           | +++         |
| <i>P5H8</i>  | +++               | ++              | Yes                           | +++         |
| <i>P5H9</i>  | +++               | ++              | Yes                           | +++         |

| <i>Clone</i> | <i>E-Cadherin</i> | <i>Vimentin</i> | <i>Cellular<br/>Co-expression</i> | <i>CD44</i> |
|--------------|-------------------|-----------------|-----------------------------------|-------------|
| <i>P5F2</i>  | +++               | +++             | Yes                               | +++         |
| <i>P5F3</i>  | +++               | ++              | Yes                               | +++         |
| <i>P6D4</i>  | +++               | +               | Yes                               | +++         |
| <i>P6E6</i>  | +++               | +++             | Yes                               | +++         |
| <i>P6H5</i>  | +++               | ++              | Yes                               | +++         |
| <i>P6C7</i>  | +++               | ++              | Yes                               | +++         |
| <i>P6D1</i>  | +++               | ++              | Yes                               | +++         |
| <i>P6D2</i>  | +++               | +++             | Yes                               | +++         |
| <i>P6E10</i> | +++               | ++              | Yes                               | +++         |
| <i>P6F12</i> | +++               | +               | No                                | +++         |
| <i>P5A2</i>  | +++               | ++              | Yes                               | +++         |
| <i>P5G11</i> | +++               | +               | Yes                               | +++         |

+++ expressed by ~10-100% of cells ++ expressed by ~1-10% of cells + expressed by ~<1% of cells - no positive cells observed  
Yes = individual cells expressing both markers present No = only single-positive cells observed



***Supplementary Table 2: List of primers used for the qRT PCR characterisation***

| <b>Primer name</b> | <b>Sequence (5'-3')</b> |
|--------------------|-------------------------|
| <b>CDH1-F</b>      | TGCCCAGAAAATGAAAAAGG    |
| <b>CDH1-R</b>      | GTGTATGTGGCAATGCGTTC    |
| <b>CDH2-F</b>      | ACAGTGGCCACCTACAAAGG    |
| <b>CDH2-R</b>      | CCGAGATGGGGTTGATAATG    |
| <b>FN1-F</b>       | CAGTGGGAGACCTCGAGAAG    |
| <b>FN1-R</b>       | TCCCTCGGAACATCAGAAAC    |
| <b>VIM-F</b>       | GAGAACTTTGCCGTTGAAGC    |
| <b>VIM-R</b>       | GCTTCCTGTAGGTGGCAATC    |
| <b>SNAI1-F</b>     | CCTCCCTGTCAGATGAGGAC    |
| <b>SNAI1-R</b>     | CCAGGCTGAGGTATTCCTTG    |
| <b>TWIST-F</b>     | GGAGTCCGCAGTCTTACGAG    |
| <b>TWIST-R</b>     | TCTGGAGGACCTGGTAGAGG    |
| <b>SNAI2-F</b>     | GGGAGAGAAGCCTTTTTCTTG   |
| <b>SNAI2-R</b>     | TCCTCATGTTTGTGCAGGAG    |
| <b>FOXC2-F</b>     | GCCTAAGGACCTGGTGAAGC    |
| <b>FOXC2-R</b>     | TTGACGAAGCACTCGTTGAG    |
| <b>ZEB1- F</b>     | GGCATAACCTACTCAACTACGG  |
| <b>ZEB1- R</b>     | TGGGCGGTGTAGAATCAGAGTC  |
| <b>OCT4-F</b>      | GATCACCCCTGGGATATACAC   |
| <b>OCT4-R</b>      | GCTTTGCATATCTCCTGAAG    |
| <b>SOX2-F</b>      | ATAATAACAATCATCGGCGG    |
| <b>SOX2-R</b>      | AAAAAGAGAGAGGCAAACCTG   |
| <b>NANOG- F</b>    | CCAGAACCAGAGAATGAAATC   |
| <b>NANOG- R</b>    | TGGTGGTAGGAAGAGTAAAG    |
| <b>HPRT-F</b>      | TGACACTGGCAAAACAATGCA   |
| <b>HPRT-R</b>      | GGTCCTTTTCACCAGCAAGCT   |
